# Supplementary material
Source: HighWire-hosted journal article supplement (https://jech.bmj.com/content/75/4/343)
Supplement: inline-supplementary-material-1 [file inline-supplementary-material-1.pdf]

## Supplementary materials: logistics models with full outputs

### Female sample

```
-----
Mild dep | Odds Rat.  Std. Err.    t    P>|t|    [95% Conf. Int.]    FMI
-----+-----
Body dissat |  1.63675   .185453    4.35   0.000    1.31042  2.04434   0.156
  Depress 14y |  1.0811   .016854    5.00   0.000    1.04856  1.11464   0.025
    BMI 10y |  .919819   .074369   -1.03   0.301    .785018  1.07777   0.018
Mother educ |  .950719   .079049   -0.61   0.543    .807633  1.11915   0.129
  Ethnicity |  .979899   .393209   -0.05   0.960    .446147  2.15221   0.086
  SES status |  1.03054   .091669    0.34   0.735    .865037  1.2277    0.284
Mother depr |  1.55752   .30908    2.23   0.026    1.05474  2.29998   0.205
-----
```

```
-----
Moderate dep | Odds Rat.  Std. Err.    t    P>|t|    [95% Conf. Int.]    FMI
-----+-----
Body dissat |  1.67415   .22546    3.83   0.000    1.28539  2.18048   0.143
  Depress 14y |  1.0869   .019793    4.58   0.000    1.04879  1.12639   0.026
    BMI 10y |  .95032   .09057   -0.53   0.593    .788397  1.1455    0.018
Mother educ |  1.00209   .103164    0.02   0.984    .818751  1.22648   0.163
  Ethnicity |  1.15083   .523128    0.31   0.757    .471957  2.8062    0.093
  SES status |  1.0298   .112864    0.27   0.789    .82983  1.27796   0.316
Mother depr |  1.48429   .341937    1.71   0.087    .944421  2.33276   0.158
-----
```

```
-----
Severe dep | Odds Rat.  Std. Err.    t    P>|t|    [95% Conf. Int.]    FMI
-----+-----
Body dissat |  1.84711   .495698    2.29   0.022    1.09123  3.12658   0.108
Depress 14y |  1.03955   .039872    1.01   0.312    .964263  1.12071   0.030
  BMI 10y |  1.10908   .19172    0.60   0.549    .79035  1.55635   0.014
-----
```

|             |  |         |         |       |       |         |         |       |
|-------------|--|---------|---------|-------|-------|---------|---------|-------|
| Mother educ |  | .80283  | .162408 | -1.09 | 0.278 | .539701 | 1.19425 | 0.174 |
| Ethnicity   |  | 3.09839 | 2.05414 | 1.71  | 0.088 | .844275 | 11.3707 | 0.104 |
| SES status  |  | 1.07686 | .248008 | 0.32  | 0.748 | .683158 | 1.69746 | 0.406 |
| Mother depr |  | 2.20042 | .984842 | 1.76  | 0.078 | .914368 | 5.29529 | 0.142 |

-----

## Male sample

---

| <b>Mild dep</b> |  | Odds Rat. | Std. Err. | t     | P> t  | [95% Conf. Int.] | FMI   |
|-----------------|--|-----------|-----------|-------|-------|------------------|-------|
| Body dissat     |  | 1.50461   | .310082   | 1.98  | 0.049 | 1.00228 2.25871  | 0.338 |
| Depress 14y     |  | 1.08271   | .031165   | 2.76  | 0.006 | 1.02332 1.14555  | 0.017 |
| BMI 10y         |  | 1.25552   | .16176    | 1.77  | 0.077 | .975323 1.61622  | 0.036 |
| Mother educ     |  | .943805   | .127212   | -0.43 | 0.668 | .724469 1.22955  | 0.147 |
| Ethnicity       |  | 1.15028   | .718578   | 0.22  | 0.823 | .338003 3.91461  | 0.070 |
| SES status      |  | .844908   | .127198   | -1.12 | 0.264 | .628225 1.13633  | 0.289 |
| Mother depr     |  | 1.07326   | .363952   | 0.21  | 0.835 | .551264 2.08956  | 0.215 |

---

---

| <b>Moderate dep</b> |  | Odds Rat. | Std. Err. | t     | P> t  | [95% Conf. Int.] | FMI   |
|---------------------|--|-----------|-----------|-------|-------|------------------|-------|
| Body dissat         |  | 1.6327    | .478128   | 1.67  | 0.097 | .914556 2.91474  | 0.444 |
| Depress 14y         |  | 1.09046   | .03921    | 2.41  | 0.016 | 1.01625 1.17009  | 0.028 |
| BMI 10y             |  | 1.22959   | .205376   | 1.24  | 0.216 | .886265 1.70592  | 0.056 |
| Mother educ         |  | .782807   | .129968   | -1.47 | 0.140 | .565276 1.08405  | 0.096 |
| Ethnicity           |  | 2.08001   | 1.34071   | 1.14  | 0.256 | .587934 7.35872  | 0.051 |
| SES status          |  | .802847   | .158503   | -1.11 | 0.267 | .544407 1.18397  | 0.276 |
| Mother depr         |  | 1.31074   | .530405   | 0.67  | 0.504 | .592429 2.90001  | 0.154 |

---

---

| <b>Severe dep</b> |  | Odds Rat. | Std. Err. | t    | P> t  | [95% Conf. Int.] | FMI   |
|-------------------|--|-----------|-----------|------|-------|------------------|-------|
| Body dissat       |  | 2.85652   | 1.27855   | 2.35 | 0.019 | 1.18612 6.87935  | 0.189 |
| Depress 14y       |  | 1.02416   | .073874   | 0.33 | 0.741 | .889141 1.17969  | 0.011 |
| BMI 10y           |  | 1.34081   | .370028   | 1.06 | 0.288 | .780642 2.30295  | 0.026 |
| Mother educ       |  | 1.04967   | .341053   | 0.15 | 0.881 | .555226 1.98444  | 0.034 |
| Ethnicity         |  | 1         | 0         | .    | .     | .                | .     |

---

|             |         |         |       |       |         |         |       |
|-------------|---------|---------|-------|-------|---------|---------|-------|
| SES status  | .764512 | .267943 | -0.77 | 0.444 | .384399 | 1.5205  | 0.132 |
| Mother depr | 1.89747 | 1.26014 | 0.96  | 0.335 | .516    | 6.97747 | 0.086 |

-----
